# Supplementary material
Source: Springer Nature journal article supplement (https://www.springermedizin.de/resource/supplementary/13000_2013_768_MOESM1_ESM.pdf/9625454)

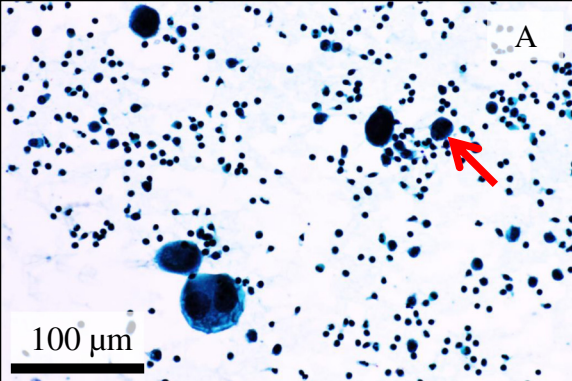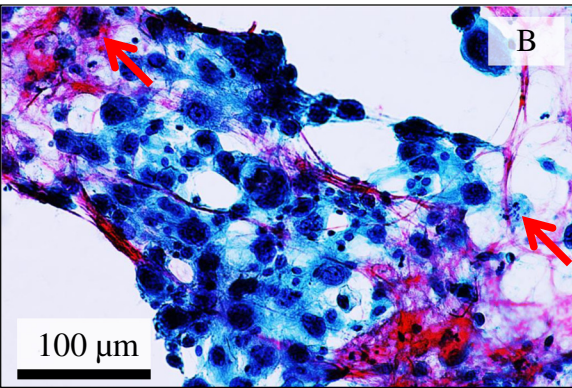

Supplement: MOESM1 [file 9625454]
